# Supplementary material
Source: PubMed Central journal article supplement (PMC6978505)
Supplement: plantbiotechnology-36-4-19.0830a-s001.pdf [file plantbiotechnology-36-4-19.0830a-s001.pdf]

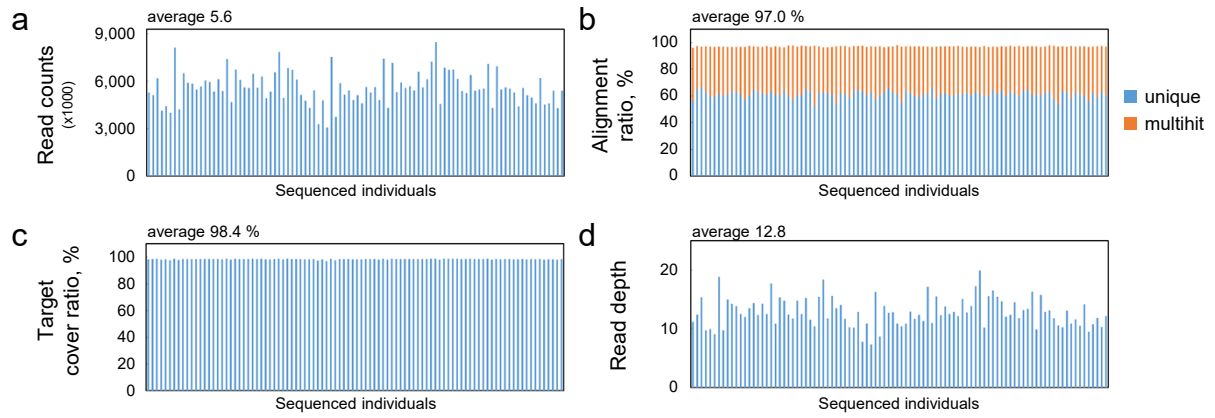

Supplementary Figure S1. Statistics of 96-plex exome sequencing. (a) Counts of short reads obtained in 96-plex exome sequencing. (b) Alignment ratio of short reads against the tomato genome reference SL3.0. (c) Coverage ratios against exome capture target regions. (d) Read depth of aligned genomic region.

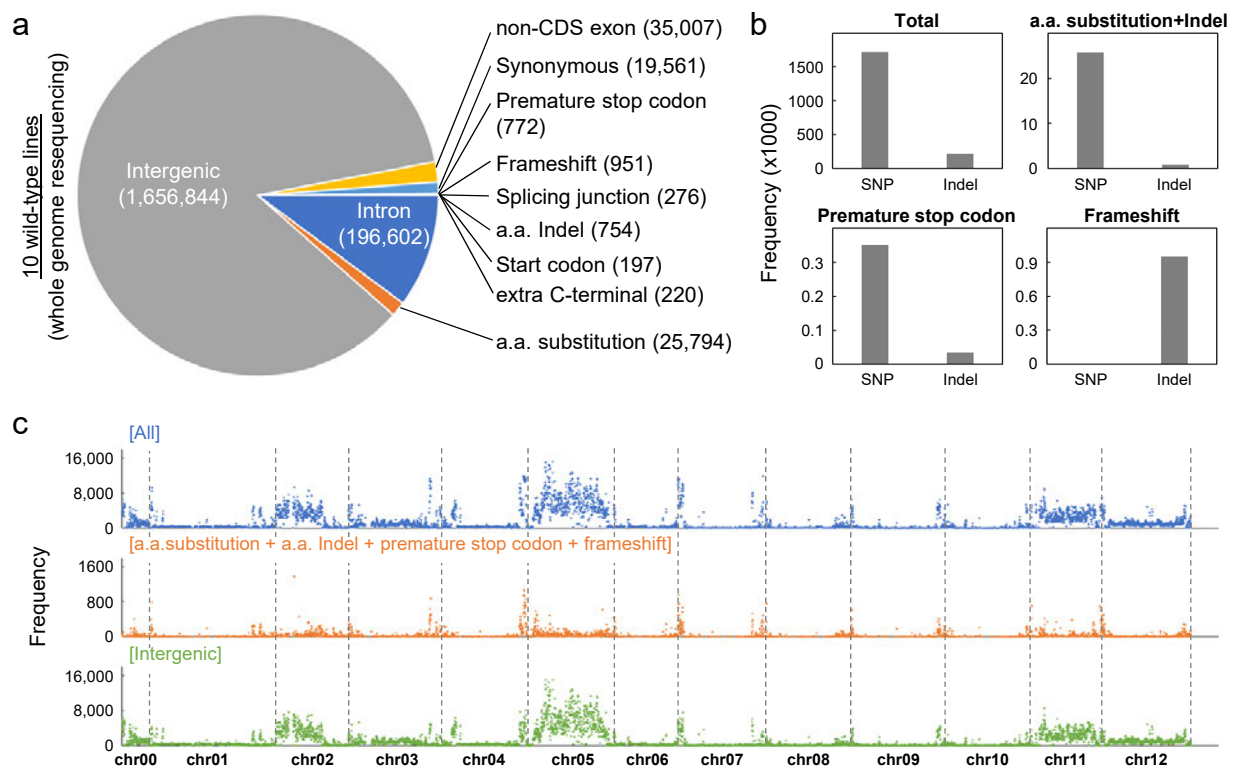

Supplementary Figure S2. Statistic summary of DNA variants identified in 95 ‘Micro-Tom’ mutants. (a) A diagram showing the frequency of mutation type in the DNA variant dataset of 10 wild types. (b) Frequencies of single nucleotide polymorphisms (SNPs) and Indels in each mutation type in the DNA variant dataset of 10 wild types. (c) Genome-wide distribution and frequency of DNA variants (natural polymorphisms) in 10 wild-type ‘Micro-Tom’ lines based on the tomato genome reference Heinz1706 SL3.0/ITAG3.10.

Supplementary Table S1. List of ‘Micro-Tom’ mutants subjected to exome sequencing. DRA accession Nos. are provided in the list.

| TOMJP identifier | Generation | Num of bulked plants | DRA accession No. | TOMJP identifier | Generation | Num of bulked plants | DRA accession No. |
|------------------|------------|----------------------|-------------------|------------------|------------|----------------------|-------------------|
| TOMJPW304_1      | M3M4       | 6                    | DRR184778         | TOMJPW954_1      | M3M4       | 7                    | DRR184826         |
| TOMJPW306_1      | M3M4       | 4                    | DRR184779         | TOMJPW955_1      | M3M3       | 9                    | DRR184827         |
| TOMJPW324_1      | M3M4       | 7                    | DRR184780         | TOMJPW1065_1     | M3M4       | 9                    | DRR184828         |
| TOMJPW333_1      | M3M3       | 2                    | DRR184781         | TOMJPW1070_1     | M3M4       | 6                    | DRR184829         |
| TOMJPW334_1      | M3M4       | 10                   | DRR184782         | TOMJPW1107_1     | M3M4       | 10                   | DRR184830         |
| TOMJPW339_1      | M3M4       | 6                    | DRR184783         | TOMJPW1110_1     | M3M4       | 5                    | DRR184831         |
| TOMJPW378_1      | M3M3       | 10                   | DRR184784         | TOMJPW1112_2     | M3M4       | 5                    | DRR184832         |
| TOMJPW402_1      | M3M4       | 4                    | DRR184785         | TOMJPW1114_1     | M3M4       | 8                    | DRR184833         |
| TOMJPW424_1      | M3M4       | 5                    | DRR184786         | TOMJPW1145_1     | M3M4       | 7                    | DRR184834         |
| TOMJPW499_1      | M3M4       | 3                    | DRR184787         | TOMJPW1152_1     | M3M4       | 7                    | DRR184835         |
| TOMJPW518_1      | M3M4       | 10                   | DRR184788         | TOMJPW1157_1     | M3M4       | 6                    | DRR184836         |
| TOMJPW534_1      | M3M3       | 10                   | DRR184789         | TOMJPW1160_1     | M3M4       | 7                    | DRR184837         |
| TOMJPW545_1      | M3M4       | 4                    | DRR184790         | TOMJPW1163_1     | M3M4       | 10                   | DRR184838         |
| TOMJPW546_1      | M3M4       | 9                    | DRR184791         | TOMJPW1169_1     | M3M4       | 10                   | DRR184839         |
| TOMJPW550_1      | M3M4       | 9                    | DRR184792         | TOMJPW1173_1     | M3M4       | 7                    | DRR184840         |
| TOMJPW558_1      | M3M3       | 7                    | DRR184793         | TOMJPW1192_1     | M3M4       | 3                    | DRR184841         |
| TOMJPW563_1      | M3M4       | 6                    | DRR184794         | TOMJPW1197_1     | M3M4       | 10                   | DRR184842         |
| TOMJPW573_1      | M3M4       | 6                    | DRR184795         | TOMJPW1208_1     | M3M4       | 6                    | DRR184843         |
| TOMJPW581_1      | M3M4       | 4                    | DRR184796         | TOMJPW1209_1     | M3M4       | 5                    | DRR184844         |
| TOMJPW600_1      | M3M4       | 10                   | DRR184797         | TOMJPW1216_1     | M3M4       | 7                    | DRR184845         |
| TOMJPW601_1      | M3M4       | 6                    | DRR184798         | TOMJPE246_1      | M6         | 5                    | DRR184846         |
| TOMJPW602_1      | M3M4       | 9                    | DRR184799         | TOMJPE3093_1     | M5         | 10                   | DRR184847         |
| TOMJPW754_1      | M3M3       | 6                    | DRR184800         | TOMJPE5045_3     | M5         | 7                    | DRR184848         |
| TOMJPW773_1      | M3M3       | 8                    | DRR184801         | TOMJPE5066_1     | M6         | 9                    | DRR184849         |
| TOMJPW775_1      | M3M4       | 3                    | DRR184802         | TOMJPE5167_6     | M5         | 9                    | DRR184850         |
| TOMJPW791_1      | M3M4       | 3                    | DRR184803         | TOMJPE5212_3     | M6         | 10                   | DRR184851         |
| TOMJPW797_1      | M3M4       | 7                    | DRR184804         | TOMJPE5215_1     | M5         | 4                    | DRR184852         |
| TOMJPW815_1      | M3M3       | 5                    | DRR184805         | TOMJPE5262_1     | M5         | 9                    | DRR184853         |
| TOMJPW817_1      | M3M4       | 4                    | DRR184806         | TOMJPE5281_4     | M5         | 8                    | DRR184854         |
| TOMJPW819_1      | M3M4       | 9                    | DRR184807         | TOMJPE5401_1     | M4         | 1                    | DRR184855         |
| TOMJPW822_1      | M3M4       | 8                    | DRR184808         | TOMJPE5405_5     | M5         | 8                    | DRR184856         |
| TOMJPW823_1      | M3M4       | 5                    | DRR184809         | TOMJPE5508_2     | M5         | 10                   | DRR184857         |
| TOMJPW831_1      | M3M4       | 10                   | DRR184810         | TOMJPE5640_1     | M5         | 2                    | DRR184858         |
| TOMJPW836_1      | M3M4       | 10                   | DRR184811         | TOMJPE5813_2     | M5         | 10                   | DRR184859         |
| TOMJPW840_1      | M3M4       | 8                    | DRR184812         | TOMJPE6034_1     | M6         | 8                    | DRR184860         |
| TOMJPW865_2      | M3M4       | 3                    | DRR184813         | TOMJPE6270_1     | M5         | 9                    | DRR184861         |
| TOMJPW879_1      | M3M4       | 6                    | DRR184814         | TOMJPE6352_1     | M5         | 7                    | DRR184862         |
| TOMJPW884_1      | M3M4       | 9                    | DRR184815         | TOMJPE6483_1     | M6         | 4                    | DRR184863         |
| TOMJPW885_1      | M3M4       | 8                    | DRR184816         | TOMJPE7255_2     | M5         | 9                    | DRR184864         |
| TOMJPW889_2      | M3M3       | 5                    | DRR184817         | TOMJPE7310_1     | M5         | 9                    | DRR184865         |
| TOMJPW892_1      | M3M3       | 6                    | DRR184818         | TOMJPE7453_1     | M5         | 7                    | DRR184866         |
| TOMJPW914_1      | M3M4       | 9                    | DRR184819         | TOMJPE8937_1     | M6         | 2                    | DRR184867         |
| TOMJPW916_1      | M3M4       | 6                    | DRR184820         | TOMJPG400_1      | M7         | 10                   | DRR184868         |
| TOMJPW920_1      | M3M4       | 8                    | DRR184821         | TOMJPG1859_1     | M5         | 8                    | DRR184869         |
| TOMJPW927_1      | M3M4       | 9                    | DRR184822         | TOMJPG2543_1     | M6         | 10                   | DRR184870         |
| TOMJPW933_1      | M3M4       | 10                   | DRR184823         | TOMJPG2574_1     | M6         | 5                    | DRR184871         |
| TOMJPW934_1      | M3M4       | 1                    | DRR184824         | TOMJPG2614_2     | M5         | 6                    | DRR184872         |
| TOMJPW952_1      | M3M4       | 7                    | DRR184825         | controlMT-WT     | -          | 10                   | DRR184873         |

Supplementary Table S2. List of hybridization enhancing (HE) oligos used for 96-plex exome capture. The '3SpC3' indicates 3'-Spacer C3 modification. All HE oligos were synthesized by using outsourcing service of Integrated DNA Technologies, Inc.

| name          | Sequence                                                                    |
|---------------|-----------------------------------------------------------------------------|
| i501 HE oligo | AATGATACGGCGACCACCGAGATCTACACTATAGCCTACACTCTTCCCTACACGACGCTCTCCGATCT/3SpC3/ |
| i502 HE oligo | AATGATACGGCGACCACCGAGATCTACACATAGAGGCACACTCTTCCCTACACGACGCTCTCCGATCT/3SpC3/ |
| i503 HE oligo | AATGATACGGCGACCACCGAGATCTACACCCATCCTACACTCTTCCCTACACGACGCTCTCCGATCT/3SpC3/  |
| i504 HE oligo | AATGATACGGCGACCACCGAGATCTACACGGCTCTGAACACTCTTCCCTACACGACGCTCTCCGATCT/3SpC3/ |
| i505 HE oligo | AATGATACGGCGACCACCGAGATCTACACAGGCGAAGACACTCTTCCCTACACGACGCTCTCCGATCT/3SpC3/ |
| i506 HE oligo | AATGATACGGCGACCACCGAGATCTACACTAATCTTAACACTCTTCCCTACACGACGCTCTCCGATCT/3SpC3/ |
| i507 HE oligo | AATGATACGGCGACCACCGAGATCTACACCAGGACGTACACTCTTCCCTACACGACGCTCTCCGATCT/3SpC3/ |
| i508 HE oligo | AATGATACGGCGACCACCGAGATCTACACGTAAGTGTGACTGGAGTTCAGACGTGTGCTCTCCGATCT/3SpC3/ |
| i701 HE oligo | CAAGCAGAAGACGGCATAACGAGATCGAGTAATGTGACTGGAGTTCAGACGTGTGCTCTCCGATCT/3SpC3/   |
| i702 HE oligo | CAAGCAGAAGACGGCATAACGAGATTCTCCGGAGTGTGACTGGAGTTCAGACGTGTGCTCTCCGATCT/3SpC3/ |
| i703 HE oligo | CAAGCAGAAGACGGCATAACGAGATAATGAGCGGTGACTGGAGTTCAGACGTGTGCTCTCCGATCT/3SpC3/   |
| i704 HE oligo | CAAGCAGAAGACGGCATAACGAGATGGAATCTCGTGACTGGAGTTCAGACGTGTGCTCTCCGATCT/3SpC3/   |
| i705 HE oligo | CAAGCAGAAGACGGCATAACGAGATTTCTGAATGTGACTGGAGTTCAGACGTGTGCTCTCCGATCT/3SpC3/   |
| i706 HE oligo | CAAGCAGAAGACGGCATAACGAGATACGAATTCGTGACTGGAGTTCAGACGTGTGCTCTCCGATCT/3SpC3/   |
| i707 HE oligo | CAAGCAGAAGACGGCATAACGAGATAGCTTCAGGTGACTGGAGTTCAGACGTGTGCTCTCCGATCT/3SpC3/   |
| i708 HE oligo | CAAGCAGAAGACGGCATAACGAGATGCGCATTAGTGACTGGAGTTCAGACGTGTGCTCTCCGATCT/3SpC3/   |
| i709 HE oligo | CAAGCAGAAGACGGCATAACGAGATCATAGCCGGTGTGACTGGAGTTCAGACGTGTGCTCTCCGATCT/3SpC3/ |
| i710 HE oligo | CAAGCAGAAGACGGCATAACGAGATTTGCGGGAGTGTGACTGGAGTTCAGACGTGTGCTCTCCGATCT/3SpC3/ |
| i711 HE oligo | CAAGCAGAAGACGGCATAACGAGATGCGCGAGAGTGTGACTGGAGTTCAGACGTGTGCTCTCCGATCT/3SpC3/ |
| i712 HE oligo | CAAGCAGAAGACGGCATAACGAGATCTATCGCTGTGACTGGAGTTCAGACGTGTGCTCTCCGATCT/3SpC3/   |

Supplementary Table S3. An example of *in silico* mutant screening based on the exome variant dataset of 95 ‘Micro-Tom’ mutants.

| mutant ID                          | DP | GQ | Chr.      | Position (bp) | REF  | ALT | location   | mutation type              | aa change |
|------------------------------------|----|----|-----------|---------------|------|-----|------------|----------------------------|-----------|
| <b><i>Solyc02g077920 (CNR)</i></b> |    |    |           |               |      |     |            |                            |           |
| TOMJPW306_1                        | 5  | 34 | SL3.0ch02 | 43309776      | G    | A   | intergenic | 1406 bp down of stop codon | -         |
| TOMJPW754_1                        | 5  | 69 | SL3.0ch02 | 43309900      | G    | T   | intergenic | 1282 bp down of stop codon | -         |
| TOMJPW754_1                        | 5  | 74 | SL3.0ch02 | 43309932      | G    | T   | intergenic | 1250 bp down of stop codon | -         |
| TOMJPW1163_1                       | 6  | 31 | SL3.0ch02 | 43312256      | G    | T   | intron.2   | intron                     | -         |
| TOMJPW306_1                        | 8  | 57 | SL3.0ch02 | 43312479      | G    | T   | CDS.1      | missense                   | L37I      |
| <b><i>Solyc10g006880 (NOR)</i></b> |    |    |           |               |      |     |            |                            |           |
| TOMJPE5640_1                       | 8  | 99 | SL3.0ch10 | 1299270       | CTTG | C   | CDS.3      | deletion                   | Q328-     |
| TOMJPG400_1                        | 8  | 67 |           |               |      |     |            |                            | Q328-     |
| TOMJPE5813_2                       | 12 | 50 | SL3.0ch10 | 1301870       | A    | AT  | -          | exon (not CDS)             | -         |
| TOMJPW889_2                        | 6  | 39 |           |               |      |     |            |                            | -         |
| <b><i>Solyc05g012020 (RIN)</i></b> |    |    |           |               |      |     |            |                            |           |
| TOMJPW934_1                        | 6  | 31 | SL3.0ch05 | 5225109       | T    | TA  | -          | exon (not CDS)             | -         |
| TOMJPW1192_1                       | 7  | 62 | SL3.0ch05 | 5225500       | G    | T   | -          | exon (not CDS)             | -         |
| TOMJPW1197_1                       | 6  | 71 | SL3.0ch05 | 5225552       | T    | C   | -          | exon (not CDS)             | -         |
| TOMJPW879_1                        | 6  | 31 | SL3.0ch05 | 5225714       | G    | A   | CDS.8      | synonymous                 | no change |
| TOMJPW840_1                        | 16 | 51 | SL3.0ch05 | 5225970       | G    | T   | intron.7   | intron                     | -         |
| TOMJPE5167_6                       | 6  | 42 | SL3.0ch05 | 5226302       | TA   | T   | intron.6   | intron                     | -         |
| TOMJPW333_1                        | 6  | 31 | SL3.0ch05 | 5226583       | A    | G   | CDS.6      | synonymous                 | no change |
| TOMJPW1065_1                       | 7  | 49 | SL3.0ch05 | 5227256       | T    | A   | CDS.3      | missense                   | Q92H      |
| TOMJPW822_1                        | 6  | 72 | SL3.0ch05 | 5227349       | A    | G   | intron.2   | intron                     | -         |
| TOMJPE7255_2                       | 6  | 72 | SL3.0ch05 | 5227957       | G    | T   | intron.1   | intron                     | -         |
| TOMJPW817_1                        | 5  | 34 | SL3.0ch05 | 5231101       | T    | A   | -          | exon (not CDS)             | -         |
| TOMJPW558_1                        | 6  | 31 | SL3.0ch05 | 5231112       | T    | C   | -          | exon (not CDS)             | -         |
